# Supplementary material for: A versatile magnetic bead-based flow cytometric assay for the detection of thyroid cancer related hsa-miR-221-3p in blood and tissues
Source: Royal Society of Chemistry journal article supplement (doi:10.1039/d0an02074e), 2020-11-20
Supplement: d0an02074e1.pdf [file d0an02074e1.pdf]

Electronic Supplementary Information (ESI) for:

**A versatile magnetic beads-based flow cytometric assay  
for detection of thyroid cancer related hsa-miR-221-3p in  
blood and tissue**

Jiaxue Gao,<sup>ab</sup> Jia Wei,<sup>c</sup> Yaoqi Wang,<sup>c</sup> Zhenshengnan Li,<sup>c</sup> Lina Ma,<sup>\*a</sup> Xianying  
Meng <sup>\*c</sup> and Zhenxin Wang <sup>a</sup>

<sup>a</sup>State Key Laboratory of Electroanalytical Chemistry, Changchun Institute of Applied Chemistry, Chinese Academy of Sciences, Changchun, 130022, P. R. China.

<sup>b</sup>University of the Chinese Academy of Sciences, Beijing, 100049, P. R. China.

<sup>c</sup>Department of Thyroid Surgery, The First Hospital of Jilin University, Changchun, Jilin 130021, P. R. China.

\*Corresponding author:

E-mail: malina@ciac.ac.cn (L.M.), mengxiany@jlu.edu.cn (X.M.).

Tel/Fax.: +86431-85262757 (L.M.).

**Contents :**

- 1. Supplementary Experimental Section**
- 2. Supplementary Table S1 to S5**
- 3. Supplementary Figure S1 to S5**
- 4. References**

## 1. Supplementary Experimental Section

### 1.1 qRT-PCR analysis of different cell lines

Total RNAs of TPC-1 and Nthy-ori 3-1 cell lines were extracted according to the miRNA extraction kit (Qiagen Co., Inc., USA) instructions. To measure the expression levels of has-miR-221-3p, total RNAs were transcribed by stem-loop reverse transcription (RT) primer using BioTeke super RT Kit (BioTeke Co., Beijing, China). Quantitative PCR (qPCR) were performed using Hieff UNICON® Universal Blue qPCR SYBR Green Master Mix (Yeasen Bio. Ltd., Shanghai, China) on ABI QuantStudio 5 system using the protocol provided by Yeasen. U6 levels were used as an internal control. The primers are listed as follows:

Reverse transcription primer of has-miR-221-3p:

GTCGTATCCAGTGCAGGGTCCGAGGTATTTCGCACTGGATACGACGAAAC  
CCA

qPCR primers :

has-miR-221-3p: forward primer: GCCGAGAGCTACATTGTCTG; reverse  
primer: GTCGTATCCAGTGCAGGG

U6: forward primer: CTCGCTTCGGCAGCACA; reverse primer:  
AACGCTTCACGAATTTGCGT

## 2. Additional Table S1-S5

**Table S1.** Sequences of used oligonucleotides in the experiments.

| Name           | Sequence (5' to 3')                     |
|----------------|-----------------------------------------|
| DNA probe      | Biotin-TTTTTTTTTTGAACCCAGCAGACAATGTAGCT |
| hsa-miR-221-3p | AGCUACAUUGUCUGCUGGGUUUC                 |
| hsa-miR-221-5p | ACCUGGCAUACAAUGUAGAUUU                  |
| hsa-miR-222-3p | AGCUACAUCUGGCUACUGGU                    |
| hsa-miR-222-5p | CUCAGUAGCCAGUGUAGAUCU                   |
| hsa-miR-let-7a | UGAGGUAGUAGGUUGUAUAGUU                  |
| hsa-miR-let-7b | UGAGGUAGUAGGUUGUGUGGUU                  |
| hsa-miR-let-7c | UGAGGUAGUAGGUUGUAUGGUU                  |
| NC-miRNA       | UUCUCCGAACGUGUCACGUTT                   |

**Table S2.** Comparison between the proposed MBs-FCM assay and other reported methods for miRNA detection.

| Analytical method <sup>a</sup> | Dynamic range    | Detection limit | References |
|--------------------------------|------------------|-----------------|------------|
| FRET                           | 0 nM - 10 nM     | 60 pM           | [1]        |
| Electrochemical                | 1 nM - 50 nM     | 28.1 nM         | [2]        |
| Chemiresistive                 | 10 pM - 100 nM   | 14.6 pM         | [3]        |
| Fluorescence                   | 0.4 nM - 4 nM    | 0.2 nM          | [4]        |
| Colorimetric                   | 0.5 pM -1 nM     | 0.5 pM          | [5]        |
| Fluorescence                   | 0.02 nM - 100 nM | 4 pM            | [6]        |
| FCM                            | 0.01 nM -10 nM   | 2.1 pM          | This work  |

<sup>a</sup> FRET, Fluorescent resonance energy transfer; FCM, flow cytometry.

**Table S3.** Recoveries for the spiked synthetic hsa-miR-221-3p in four human plasma obtained by this assay (n=3).

| Samples           | Spiked (pM) | Measured (pM) | RSD (%) | Recovery (%) |
|-------------------|-------------|---------------|---------|--------------|
| Sample 1 (PTC)    | 5           | 5.49          | 3.1     | 109.8        |
|                   | 50          | 54.78         | 4.7     | 104.8        |
|                   | 500         | 532.62        | 2.6     | 106.5        |
| Sample 3 (PTC)    | 5           | 5.37          | 3.5     | 107.4        |
|                   | 50          | 53.68         | 1.4     | 107.3        |
|                   | 500         | 547.83        | 3.9     | 109.5        |
| Sample 3 (nodule) | 5           | 4.64          | 4.2     | 92.8         |
|                   | 50          | 48.68         | 1.4     | 97.3         |
|                   | 500         | 524.69        | 1.9     | 104.9        |
| Sample 4 (nodule) | 5           | 4.73          | 3.7     | 94.6         |
|                   | 50          | 54.36         | 4.6     | 108.6        |
|                   | 500         | 538.72        | 2.8     | 107.7        |

**Table S4.** The information of 27 PTC patients.

| Patients Number | Gender | Age | Diagnosis | TNM Tumor Staging |
|-----------------|--------|-----|-----------|-------------------|
| 1               | female | 44  | PTC       | IIIA (T1aN1aM0)   |
| 2               | female | 52  | PTC       | IIIA (T1aN1aM0)   |
| 3               | female | 59  | PTC       | IB (T1bN0M0)      |
| 4               | female | 30  | PTC       | IA (T1aN0M0)      |
| 5               | female | 55  | PTC       | IIIA (T1aN1aM0)   |
| 6               | male   | 40  | PTC       | IIIB (T1bN1bM0)   |
| 7               | female | 45  | PTC       | IIIA (T1aN1aM0)   |
| 8               | female | 28  | PTC       | IIIB (T1bN1bM0)   |
| 9               | male   | 46  | PTC       | IA (T1aN0M0)      |
| 10              | female | 32  | PTC       | IIIA (T1aN1aM0)   |
| 11              | female | 48  | PTC       | IA (T1aN0M0)      |
| 12              | female | 46  | PTC       | IIIA (T1bN1aM0)   |
| 13              | male   | 26  | PTC       | IIIA (T2N1aM0)    |
| 14              | female | 50  | PTC       | IIIA (T1bN1aM0)   |
| 15              | female | 58  | PTC       | IIIA (T1aN1aM0)   |
| 16              | female | 28  | PTC       | IB (T1bN0M0)      |
| 17              | male   | 26  | PTC       | IB (T1bN0M0)      |
| 18              | female | 52  | PTC       | IA (T1aN0M0)      |
| 19              | female | 25  | PTC       | IIIB (T2N1bM0)    |
| 20              | female | 55  | PTC       | IA (T1aN0M0)      |
| 21              | male   | 49  | PTC       | IIIA (T1aN1aM0)   |
| 22              | female | 53  | PTC       | IIIA (T1aN1aM0)   |
| 23              | female | 34  | PTC       | IA (T1aN0M0)      |
| 24              | female | 44  | PTC       | IIIA (T1bN1aM0)   |
| 25              | female | 47  | PTC       | IA (T1aN0M0)      |
| 26              | male   | 36  | PTC       | IIIA (T1aN1aM0)   |
| 27              | male   | 79  | PTC       | IIIB (T1bN1bM0)   |

**Table S5.** Comparison of the detection results by this assay to ultrasonography results.

| Patients Number | Our assay <sup>a</sup> | Ultrasonography results |
|-----------------|------------------------|-------------------------|
| 1               | C                      | C                       |
| 2               | N                      | N                       |
| 3               | N                      | N                       |
| 4               | N                      | N                       |
| 5               | N                      | C                       |
| 6               | C                      | C                       |
| 7               | C                      | C                       |
| 8               | N                      | C                       |
| 9               | N                      | N                       |
| 10              | N                      | C                       |
| 11              | C                      | C                       |
| 12              | C                      | C                       |
| 13              | C                      | N                       |
| 14              | C                      | C                       |
| 15              | C                      | C                       |

<sup>a</sup> C represent cancer patient, N represent normal patient.

### 3. Additional Figure S1-S5

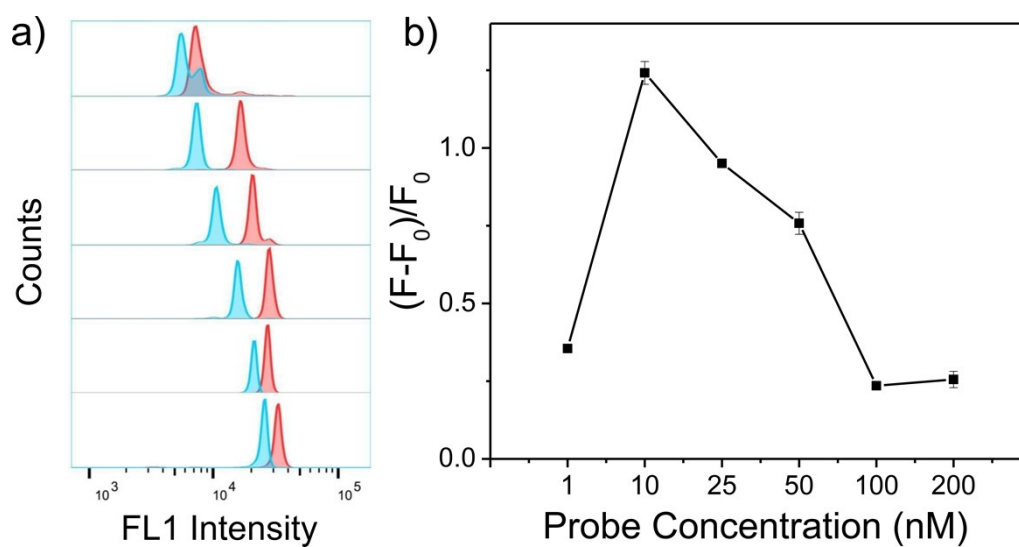

**Fig. S1.** Effect of the probe densities of the MBs-probe conjugates for the detection of has-miR-221-3p. a) Fluorescence responses of the MBs-probe conjugates treated with 1 nM has-miR-221-3p (red lines) in comparison with blank control (blue lines) under different probe concentrations from up to down (1, 10, 25, 50, 100 and 200 nM). b) The corresponding relative fluorescence intensity changes with different probe concentrations. Error bars mean standard deviations (n=3).



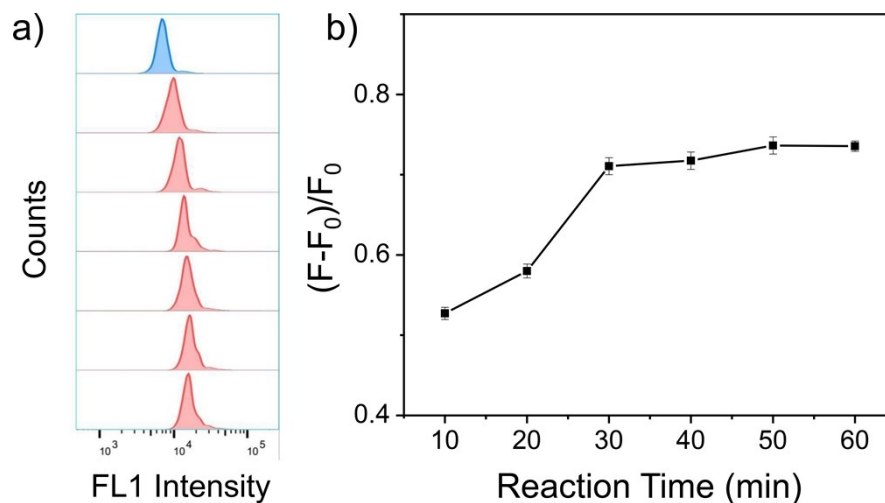

**Fig. S2.** Optimization of reaction time for the detection of hsa-miR-221-3p. a) Fluorescence responses of the MBs-probe conjugates treated with 100 pM hsa-miR-221-3p (red lines) in comparison with blank control (blue line) under different reaction time from up to down (10, 20, 30, 40, 50 and 60 min). b) The corresponding relative fluorescence intensity changes with different reaction times. Error bars mean standard deviations (n=3).

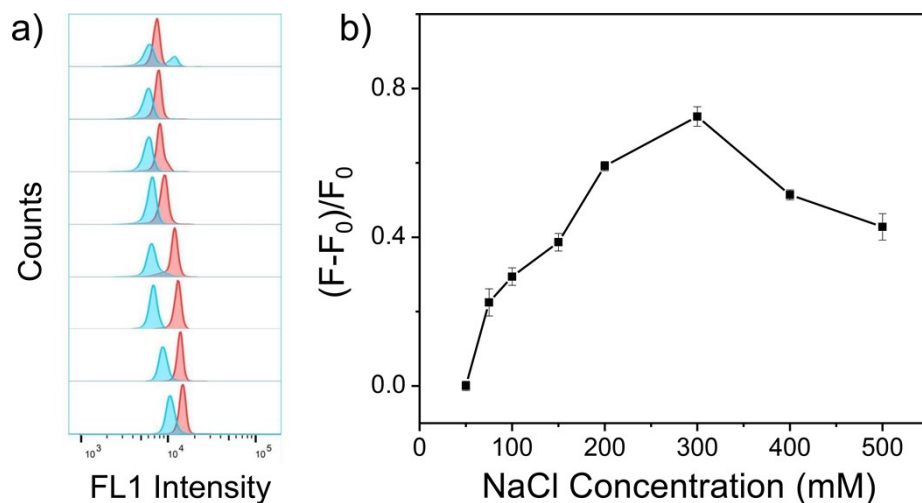

**Fig. S3.** Effect of NaCl concentration for the detection of hsa-miR-221-3p. a) Fluorescence responses of the MBs-probe conjugates treated with 100 pM hsa-miR-221-3p (red lines) in comparison with blank control (blue lines) under different concentrations of NaCl from up to down (50, 75, 100, 150, 200, 300, 400 and 500 mM). b) The corresponding relative fluorescence intensity changes with different concentrations of NaCl. Error bars mean standard deviations (n=3).

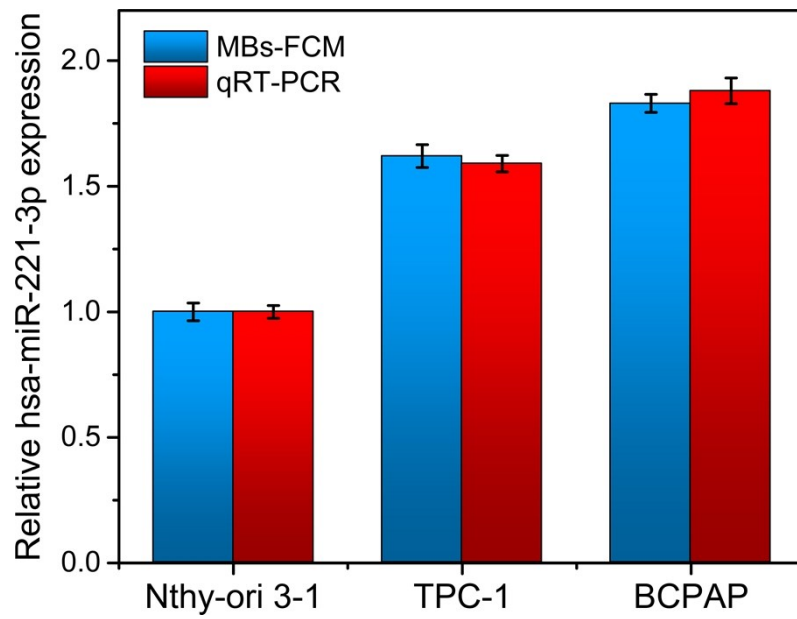

**Fig. S4.** Relative expression levels of has-miR-221-3p in TPC-1, BCPAC and Nthy-ori 3-1 cell lines obtained by the proposed MBs-FCM assay and qRT-PCR. Error bars mean standard deviations (n=3).

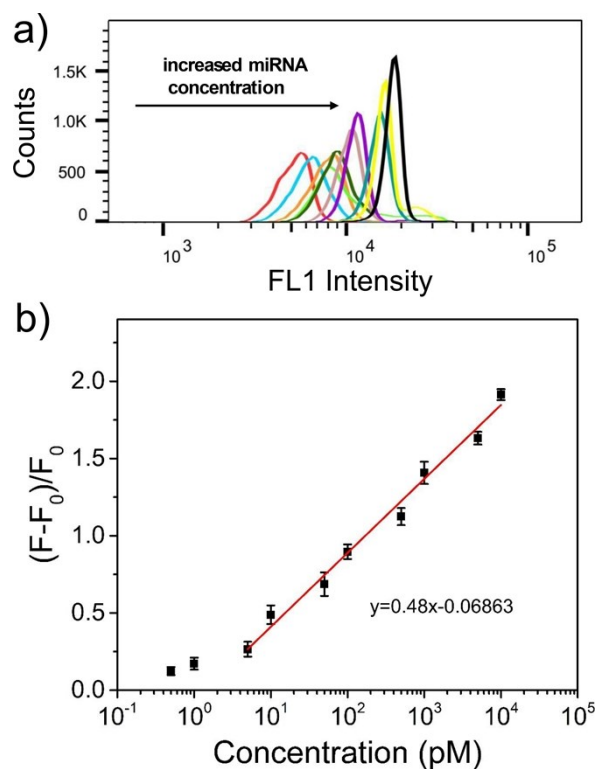

**Fig. S5.** a) Fluorescence response of MBs-probe conjugates incubated with 10% plasma spiked with different concentrations of hsa-miR-221-3p. b) The corresponding relative fluorescence intensity changes as a function of concentration of hsa-miR-221-3p. Error bars mean standard deviations (n=3).

#### 4. Reference

- [1] T. Xue, S. R. Bongu, H. Huang, W. Liang, Y. Wang, F. Zhang, Z. Liu, Y. Zhang, H. Zhang and X. Cui, *Chem. Commun.*, 2020, **56**, 7041-7044.
- [2] G. Congur, E. Eksin, A. Erdem, *Electrochim. Acta*, 2015, **172**, 20.
- [3] C. H. Huang, T. T. Huang, C. H. Chiang, W. T. Huang and Y. T. Lin, *Biosens. Bioelectron.*, 2020, **164**, 112320.
- [4] F. H. Zhai, Q. Q. Zhan, K. Wang, S. Chen and R. H. He, *Sens. Actuators, B*, 2020, **320**, 128394.
- [5] K. Wang, D. Q. Fan, Y. Q. Liu, S. J. Dong, *Biosens. Bioelectron.*, 2017, **87**, 116.
- [6] V. Nasirian, M. Shamsipur, F. Molaabasi, K. Mansouri, M. Sarparast, V. Salim, A. Barati and S. Kashanian, *Sens. Actuators, B*, 2020, **308**, 127673.
